# Supplementary material
Source: PubMed Central journal article supplement (PMC6138870)
Supplement: NIHMS911897-supplement-2.pdf [file NIHMS911897-supplement-2.pdf]

1 **Viral and Cellular  $N^6$ -Methyladenosine ( $m^6A$ ) and  $N^6$ , 2'-O-Dimethyladenosine**  
2 **( $m^6Am$ ) Epitranscriptomes in KSHV Life Cycle**

3  
4 Brandon Tan<sup>1</sup>, Hui Liu<sup>1,2,7</sup>, Songyao Zhang<sup>3,4,7</sup>, Suzane Ramos da Silva<sup>1</sup>, Lin Zhang<sup>2,3</sup>,  
5 Jia Meng<sup>5</sup>, Xiaodong Cui<sup>3</sup>, Hongfeng Yuan<sup>1</sup>, Océane Sorel<sup>1</sup>, Shaowu Zhang<sup>4</sup>, Yufei  
6 Huang<sup>3,\*</sup>, Shou-Jiang Gao<sup>1,6\*</sup>

7  
8 <sup>1</sup>Department of Molecular Microbiology and Immunology, Keck School of Medicine,  
9 University of Southern California, Los Angeles, CA, 90033, USA; <sup>2</sup>School of Information  
10 and Electrical Engineering, China University of Mining and Technology, Xuzhou,  
11 Jiangsu 221116, China; <sup>3</sup>Department of Electrical and Computer Engineering,  
12 University of Texas at San Antonio, San Antonio, TX, 78249, USA; <sup>4</sup>School of  
13 Automation, Northwestern Polytechnic University, Xi'an, Shaanxi, 710072, China;  
14 <sup>5</sup>Department of Biological Sciences, Xi'an Jiaotong-Liverpool University, Suzhou,  
15 Jiangsu 215123, China; <sup>6</sup>Laboratory of Human Virology and Oncology, Shantou  
16 University Medical College, Shantou, Guangdong 515041, China. <sup>7</sup>Equal contribution.  
17 \*Corresponding authors.

18  
19  
20 **Supplementary Figures and Tables**

21  
22 **Supplementary Figure 1:** Expression of  $m^6A/m$ -related enzymes in uninfected cells,  
23 cells latently infected by KSHV, and cells induced for lytic replication.

24  
25 **Supplementary Figure 2:** Read tracks and  $m^6A/m$  peaks of the KSHV genome in  
26 different cell types from three biological replicates.

27  
28 **Supplementary Figure 3:** Effects of YTHDF1, YTHDF3, YTHDC1, and YTHDC2  
29 knockdown on KSHV lytic replication.

30  
31 **Supplementary Figure 4:** mRNA lifetimes of  $m^6A/m$ ,  $m^6Am$  and unmethylated  
32 transcripts in KiSLK cells treated with a control siRNA (siCI) or a siRNA to YTHDF2  
33 (siY2-1).

34  
35 **Supplementary Figure 5:** Analyses of conserved and uniquely methylated cellular  
36 genes among four different uninfected cells.

37  
38 **Supplementary Figure 6:** Illustration and validation of selected cellular  $m^6A/m$  peaks in  
39 four pairs of uninfected cells and cells latently infected by KSHV.

40  
41 **Supplementary Figure 7:** Clustering analysis of different types of cells latently infected  
42 by KSHV, and uninduced and induced KiSLK and BCBL1-R cells.

44 **Supplementary Figure 8:** Illustration and validation of selected cellular m<sup>6</sup>A/m peaks in  
45 uninduced cells and cells induced for lytic replication.

46  
47 **Supplementary Figure 9:** Schematic illustration of features of viral and cellular m<sup>6</sup>A/m  
48 epitranscriptomes in KSHV latent and lytic infection, and a model of YTHDF2-mediated  
49 inhibition of KSHV lytic replication.

50  
51 **Supplementary Figure 10:** Uncropped images of Western-blot.

52  
53 **Supplementary Table 1:** Latent KSHV m<sup>6</sup>A/m peaks in five types of cells latently  
54 infected by KSHV.

55  
56 **Supplementary Table 2:** Latent and lytic KSHV m<sup>6</sup>A/m peaks in KiSLK and BCBL1-R  
57 cells.

58  
59 **Supplementary Table 3:** Summary of cellular m<sup>6</sup>A/m peaks from three biological  
60 replicates of all cell types.

61  
62 **Supplementary Table 4:** Differential cellular methylation and gene expression in  
63 uninfected cells and cells latently infected by KSHV.

64  
65 **Supplementary Table 5:** Significantly enriched pathways of hypomethylated and  
66 hypermethylated cellular genes following latent KSHV infection.

67  
68 **Supplementary Table 6:** Differential cellular methylation and gene expression in  
69 KSHV-infected cells induced for lytic replication for 48 h compared to uninduced cells in  
70 KiSLK and BCBL1-R cells.

71  
72 **Supplementary Table 7:** Significantly enriched pathways of 5'UTR hypomethylated  
73 and 3'UTR hypermethylated cellular genes in KSHV-infected cells induced for lytic  
74 replication for 48 h compared to uninduced cells in KiSLK and BCBL1-R cells.

75  
76 **Supplementary Table 8:** Summary of the numbers of mapped cellular and viral  
77 sequencing reads in different samples.

78  
79  
80  
81

## Supplementary Figures

82 **Supplementary Figure 1. Expression of m<sup>6</sup>A/m-related enzymes in uninfected**  
 83 **cells, cells latently infected by KSHV, and cells induced for lytic replication. a,b,**  
 84 **Transcript (a) and protein (b) levels of m<sup>6</sup>A/m-related proteins in uninfected cells and**  
 85 **cells latently infected by KSHV examined by RT-qPCR and Western-blotting,**  
 86 **respectively. Results are from a single experiment. c,d, Transcript (c) and protein (d)**  
 87 **levels of m<sup>6</sup>A/m-related proteins in KiSLK (left) and BCBL1-R (right) cells induced for**  
 88 **lytic replication examined by RT-qPCR and Western-blotting, respectively. The**  
 89 **experiments were independently repeated two times. RT-qPCR results are presented**  
 90 **as mean. Western-blot from one representative experiment are presented.**

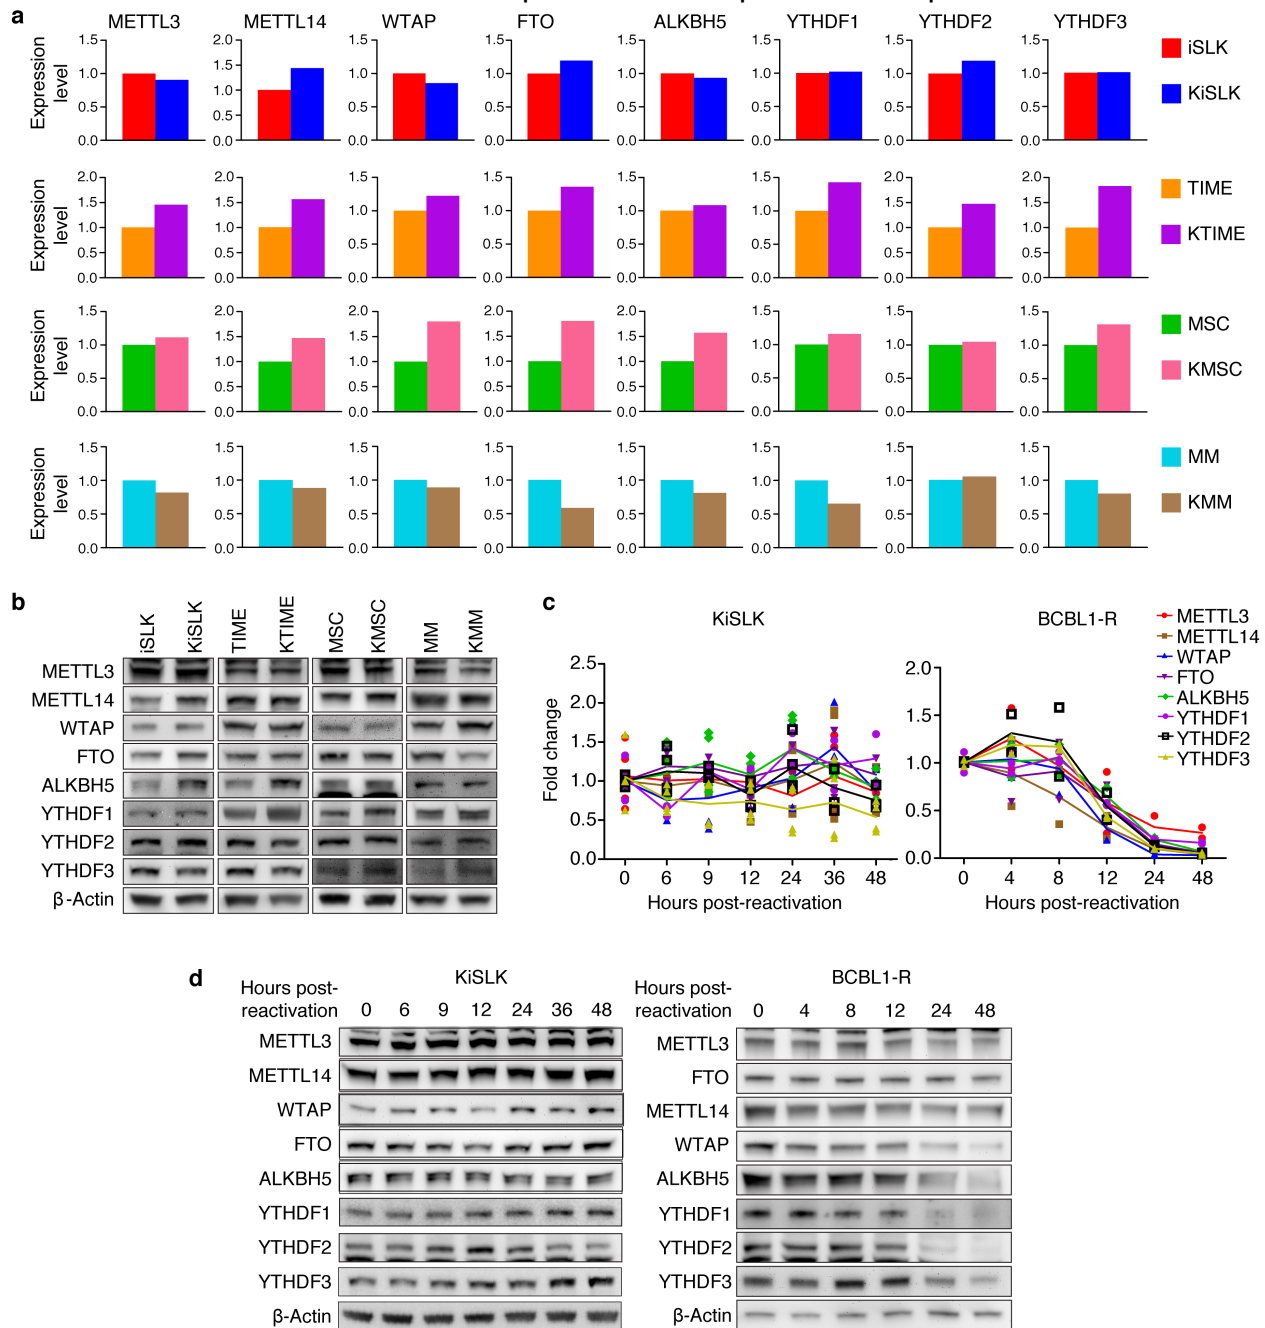

92 **Supplementary Figure 2. Read tracks and m<sup>6</sup>A/m peaks of the KSHV genome in**  
 93 **different cell types from three biological replicates.** Read tracks indicating IP (red)  
 94 and input (blue) reads, and m<sup>6</sup>A/m peaks of the KSHV genome from three biological  
 95 replicates of KiSLK (latent, 24 h, and 48 h), BCBL1-R (latent and 48 h), KTIME (latent),  
 96 KMSC (latent), and KMM (latent) cells.  
 97

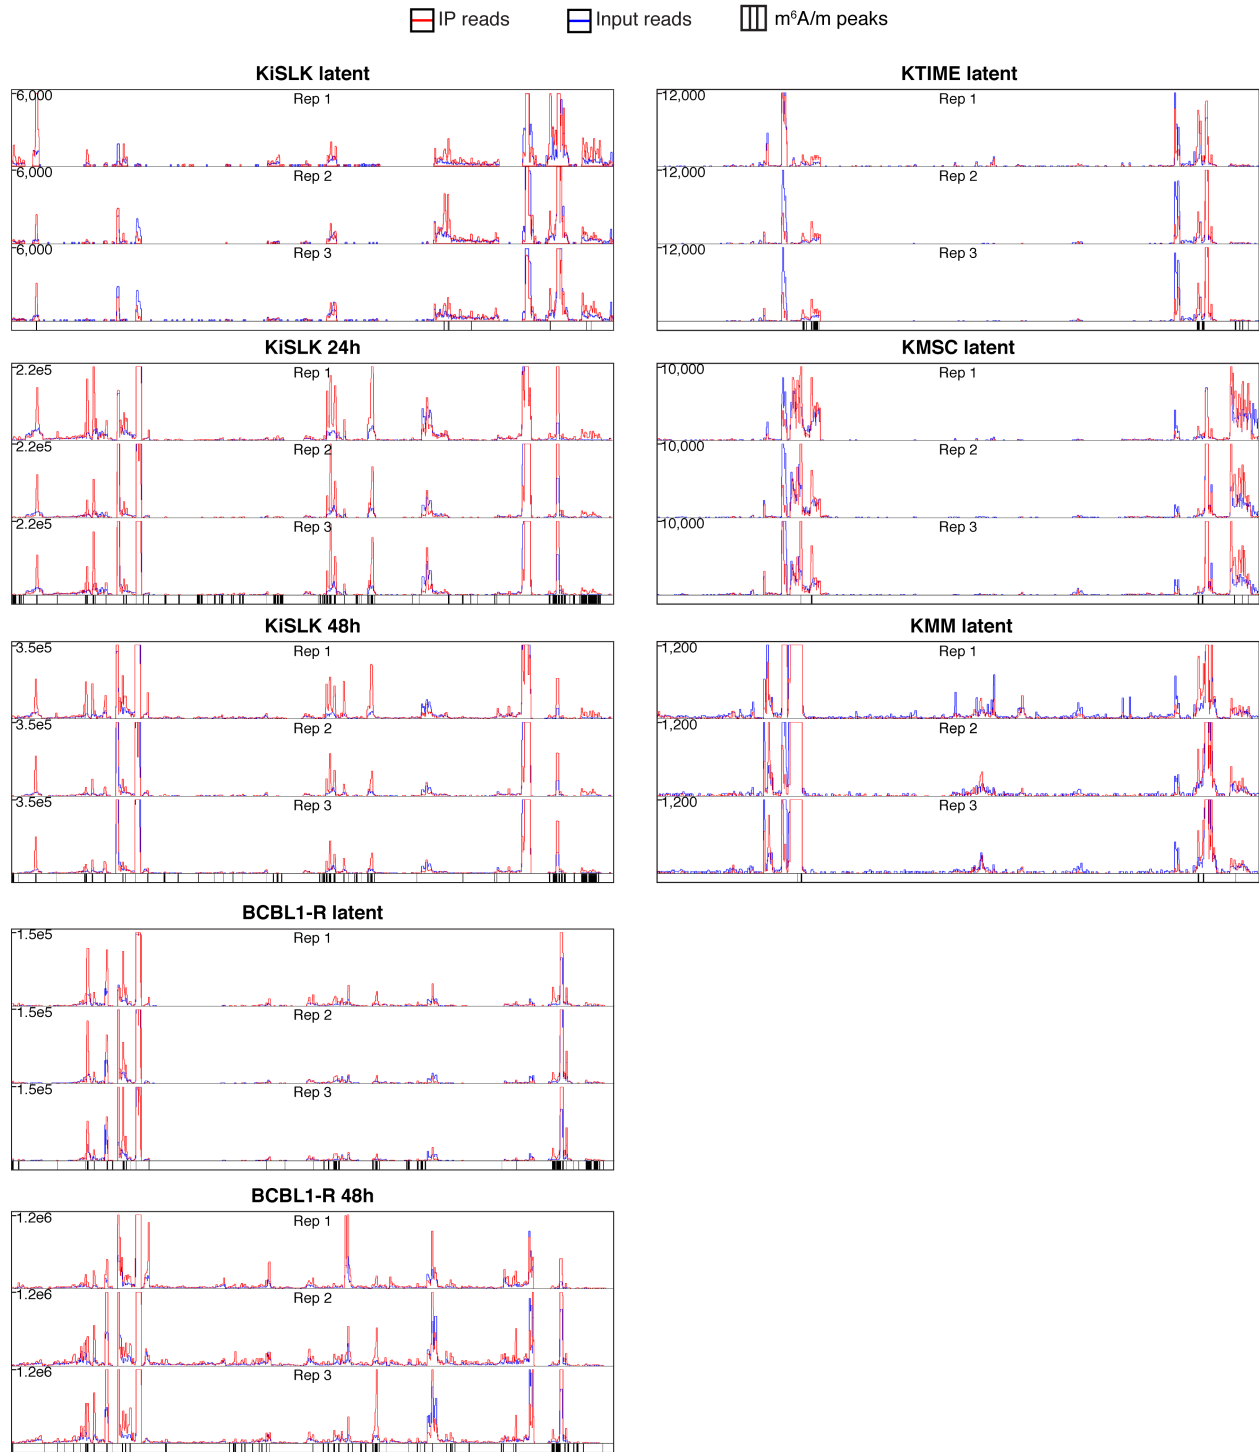

98

99 **Supplementary Figure 3. Effect of YTHDF1, YTHDF3, YTHDC1, or YTHDC2**  
100 **knockdown on KSHV lytic replication. a,b,** Examination of knockdown efficiency of  
101 each reader by Western-blotting (**a**) and RT-qPCR (**b**) on day 2 post-transfection with  
102 the respective siRNA. **c,** Quantification of KSHV virions in culture supernatant by qPCR  
103 at day 3 after induction of lytic replication. For YTHDF1 (Y1) and YTHDF1 (Y3),  
104 experiments were repeated three times and results are presented as mean +/- SD from  
105 the three experiments (**b,c**). For YTHDC1 (DC1) and YTHDC1 (DC2), experiments were  
106 repeated twice and results are presented as mean (**b,c**). Western-blotting results are  
107 representative results from one experiment (**a**). **d,e,** Levels of viral transcripts (**d**) and  
108 proteins (**e**) were examined by RT-qPCR and Western-blotting, respectively, at day 3  
109 after induction of lytic replication. Experiments were repeated three times and results  
110 are presented as mean +/- SD from the three experiments. NS = not significant, \*  
111  $p < 0.05$ , \*\*  $p < 0.01$ , \*\*\*  $p < 0.001$ . Western-blotting results are representative results from  
112 one experiment (**e**). Gel image for Y1 (a) was cropped from a single blot.

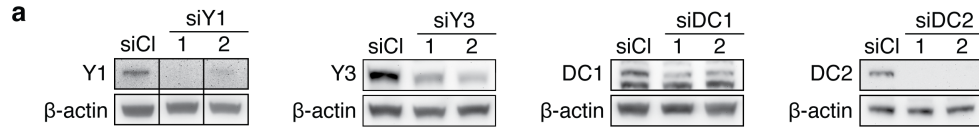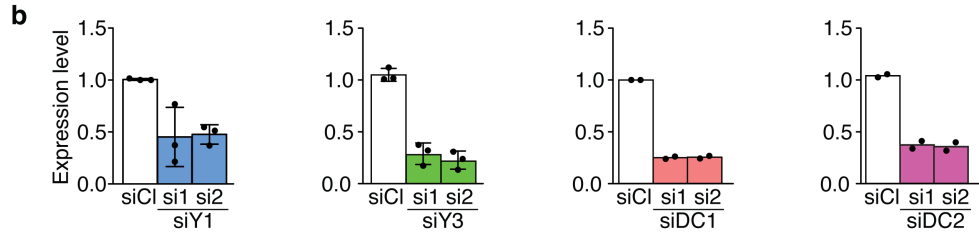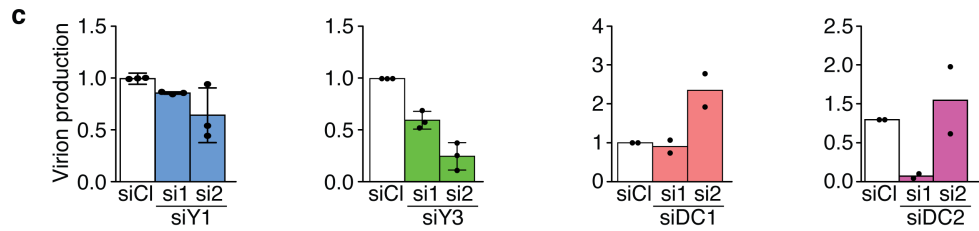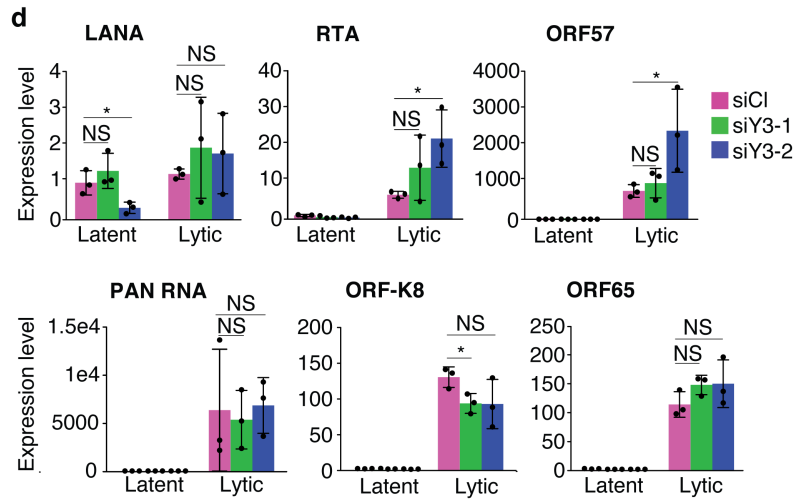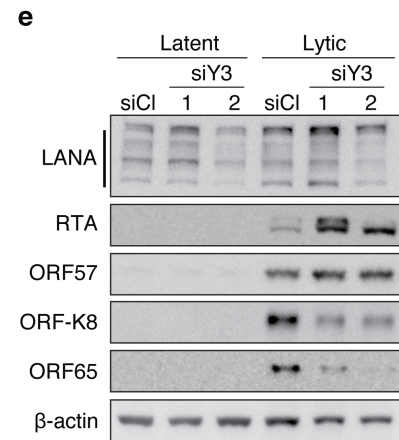

113  
114

115 **Supplementary Figure 4. mRNA lifetimes of m<sup>6</sup>A/m, m<sup>6</sup>Am and unmethylated**  
 116 **transcripts in KiSLK cells treated with a control siRNA (siCl) or a siRNA to**  
 117 **YTHDF2 (siY2-1). a, Cellular mRNA lifetimes of m<sup>6</sup>A/m, m<sup>6</sup>Am, and unmethylated**  
 118 **mRNA in siCl cells. b, Cellular mRNA lifetimes of m<sup>6</sup>A/m, m<sup>6</sup>Am, and unmethylated**  
 119 **mRNA in YTHDF2 knockdown cells. c, mRNA lifetimes of cellular transcripts in siCl and**  
 120 **YTHDF2 knockdown cells. Results are from two independent experiments.**  
 121

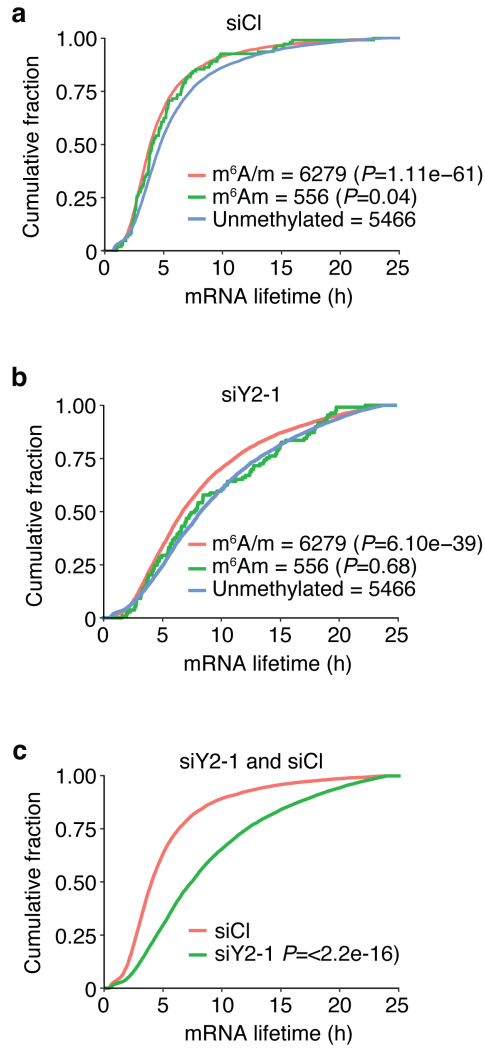

122

123 **Supplementary Figure 5. Analyses of conserved and unique methylated cellular**  
 124 **genes among four different uninfected cells. a,** Venn diagram showing the overlaps  
 125 of methylated cellular genes in four types of uninfected cells. **b,** Cluster analysis of  
 126 m<sup>6</sup>A/m methylated cellular genes of four types of uninfected cells. The results are from  
 127 three biological replicates.  
 128

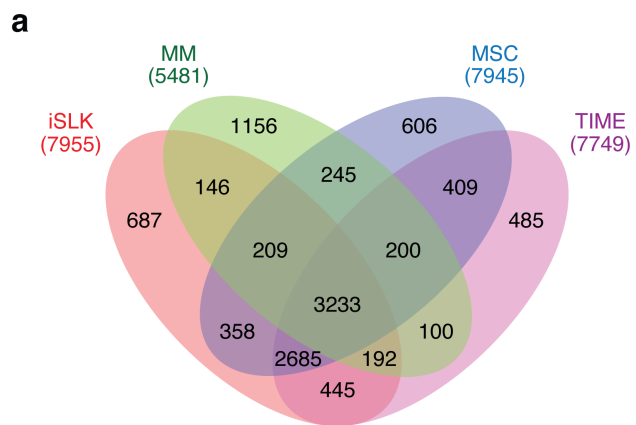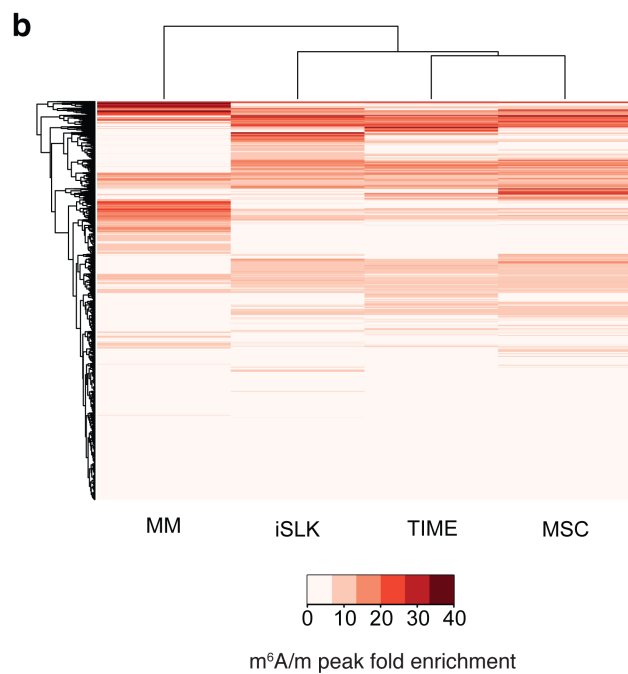

129



130 **Supplementary Figure 6. Illustration and validation of selected cellular m<sup>6</sup>A/m**  
131 **peaks in four pairs of uninfected cells and cells latently infected by KSHV. a,**  
132 **Regions of Dicer1 with and without an m<sup>6</sup>A/m peak and JunB containing an m<sup>6</sup>A/m peak**  
133 **with qPCR amplicons indicated. For KMM and MM cells, no m<sup>6</sup>A/m peak was detected**  
134 **by exomePeak in Dicer1 as the gene was not annotated by the rn5 rat genome. b,**  
135 **Validation of cellular m<sup>6</sup>A/m peaks shown in (a) by MeRIP-qPCR. Experiments were**  
136 **independently repeated three times, and results are presented as mean +/- SD from the**  
137 **three experiments.**

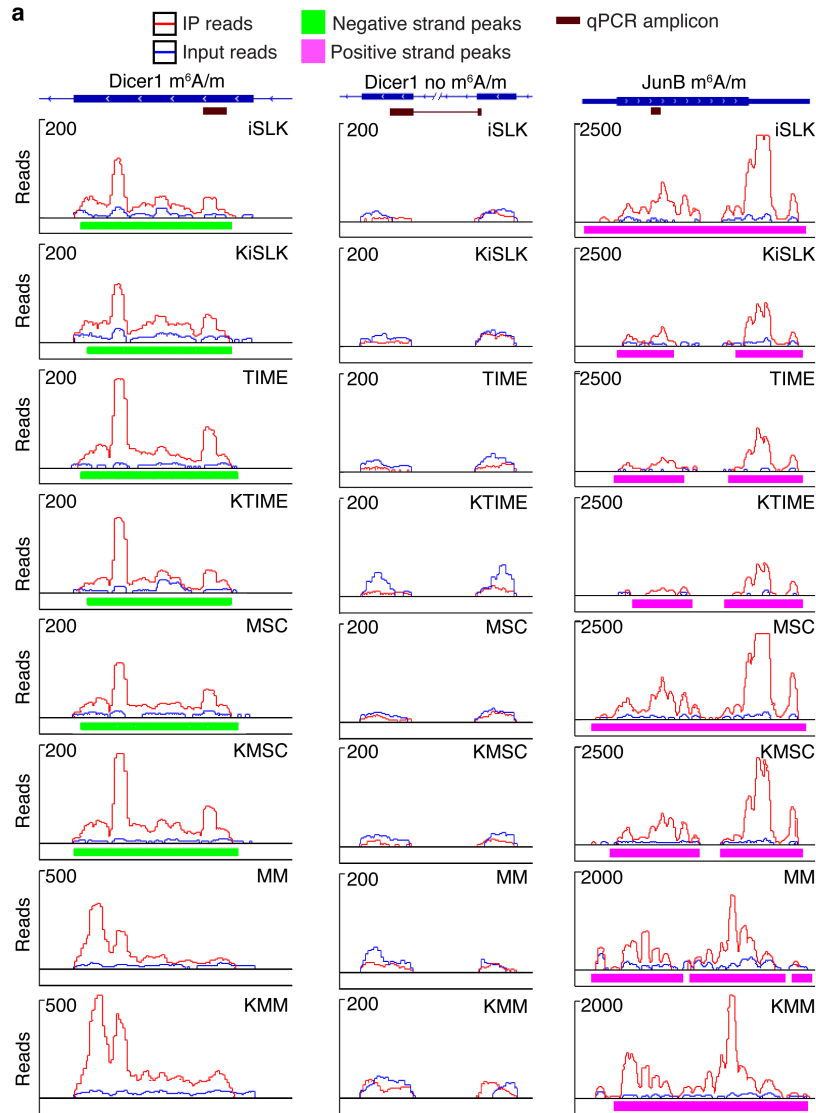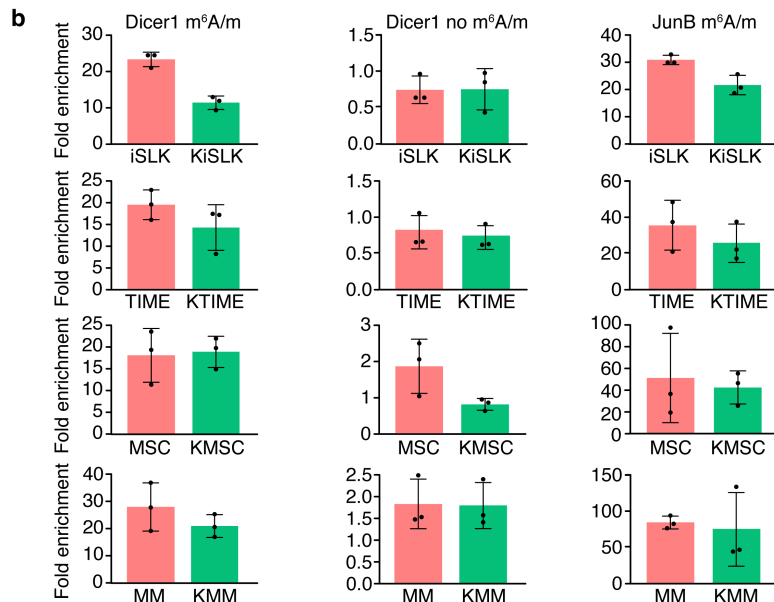

139 **Supplementary Figure 7. Clustering analysis of different types of cells latently**  
140 **infected by KSHV, and uninduced and induced KiSLK and BCBL1-R cells. a,**  
141 **Cluster analysis of m<sup>6</sup>A/m methylated cellular genes of five types of cells latently**  
142 **infected by KSHV. b, Cluster analysis of m<sup>6</sup>A/m methylated cellular genes of uninduced**  
143 **and induced KiSLK and BCBL1-R cells. The results are from three biological replicates.**  
144

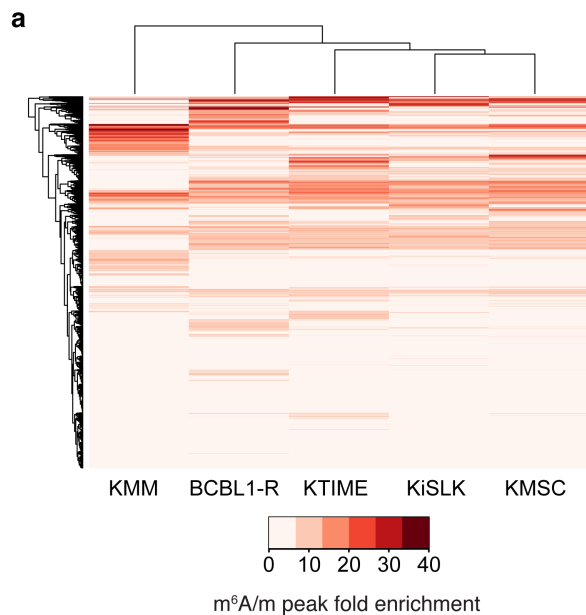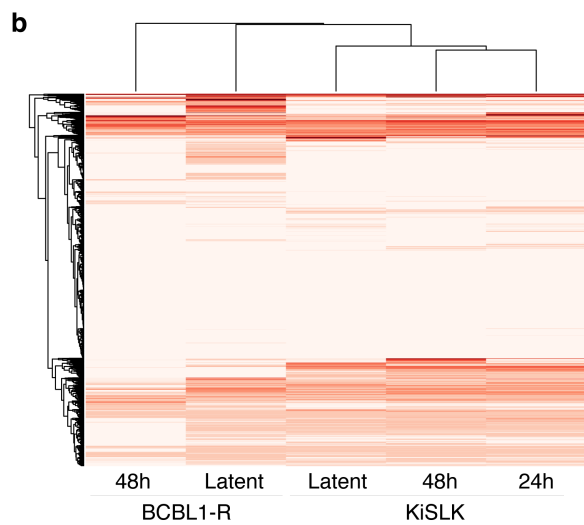

145

146  
147  
148  
149  
150  
151  
152

**Supplementary Figure 8. Illustration and validation of selected cellular m<sup>6</sup>A/m peaks in uninduced cells and cells induced for lytic replication.** **a**, Regions of Dicer1 with and without a m<sup>6</sup>A/m peak and JunB containing a m<sup>6</sup>A/m peak with qPCR amplicons indicated. **b**, Validation of cellular m<sup>6</sup>A/m peaks shown in (a) by MeRIP-qPCR. Experiments were independently repeated three times, and results are presented as mean +/- SD from the three experiments.

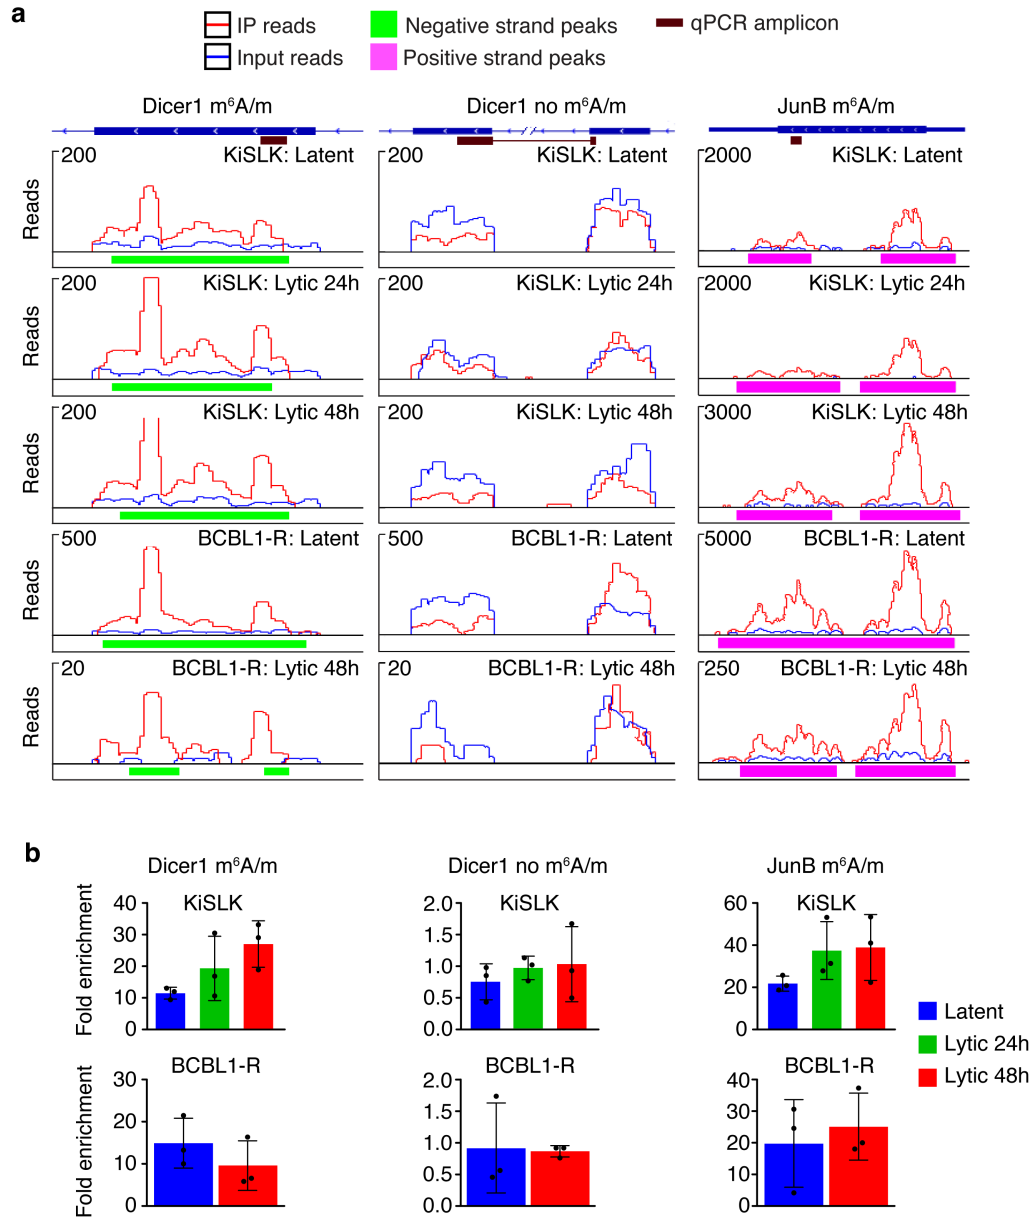

153

154 **Supplementary Figure 9:** Schematic illustration of features of viral and cellular m<sup>6</sup>A/m  
155 epitranscriptomes in KSHV latent and lytic infection, and model of YTHDF2-mediated  
156 inhibition of KSHV lytic replication.  
157  
158

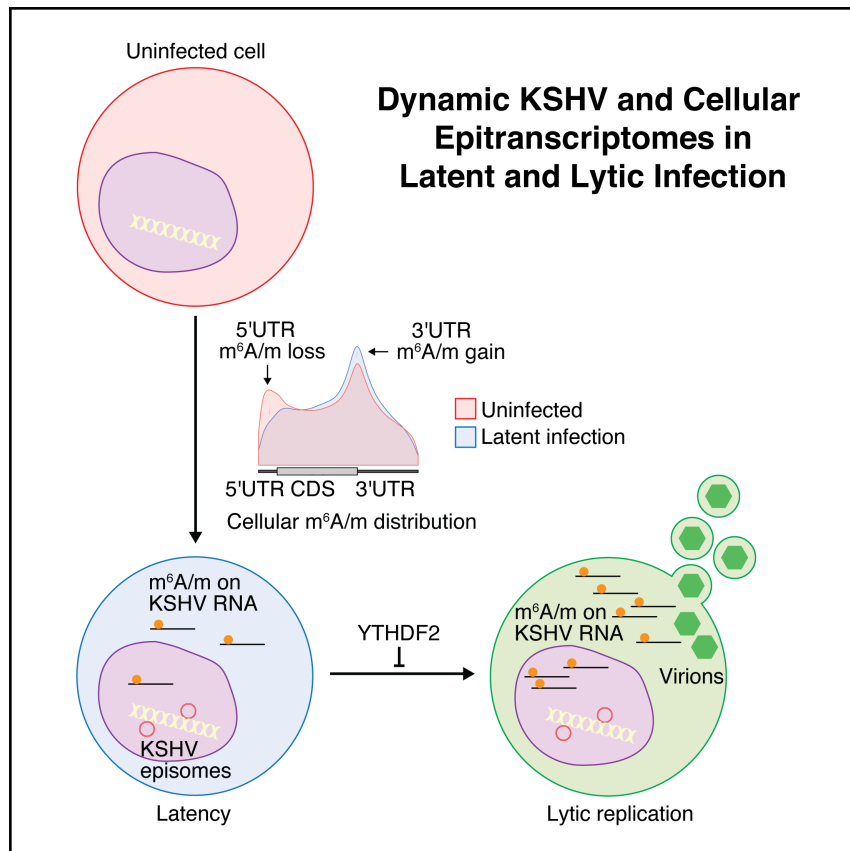

159

**Supplementary Figure 10: Uncropped images of Western-blots.**

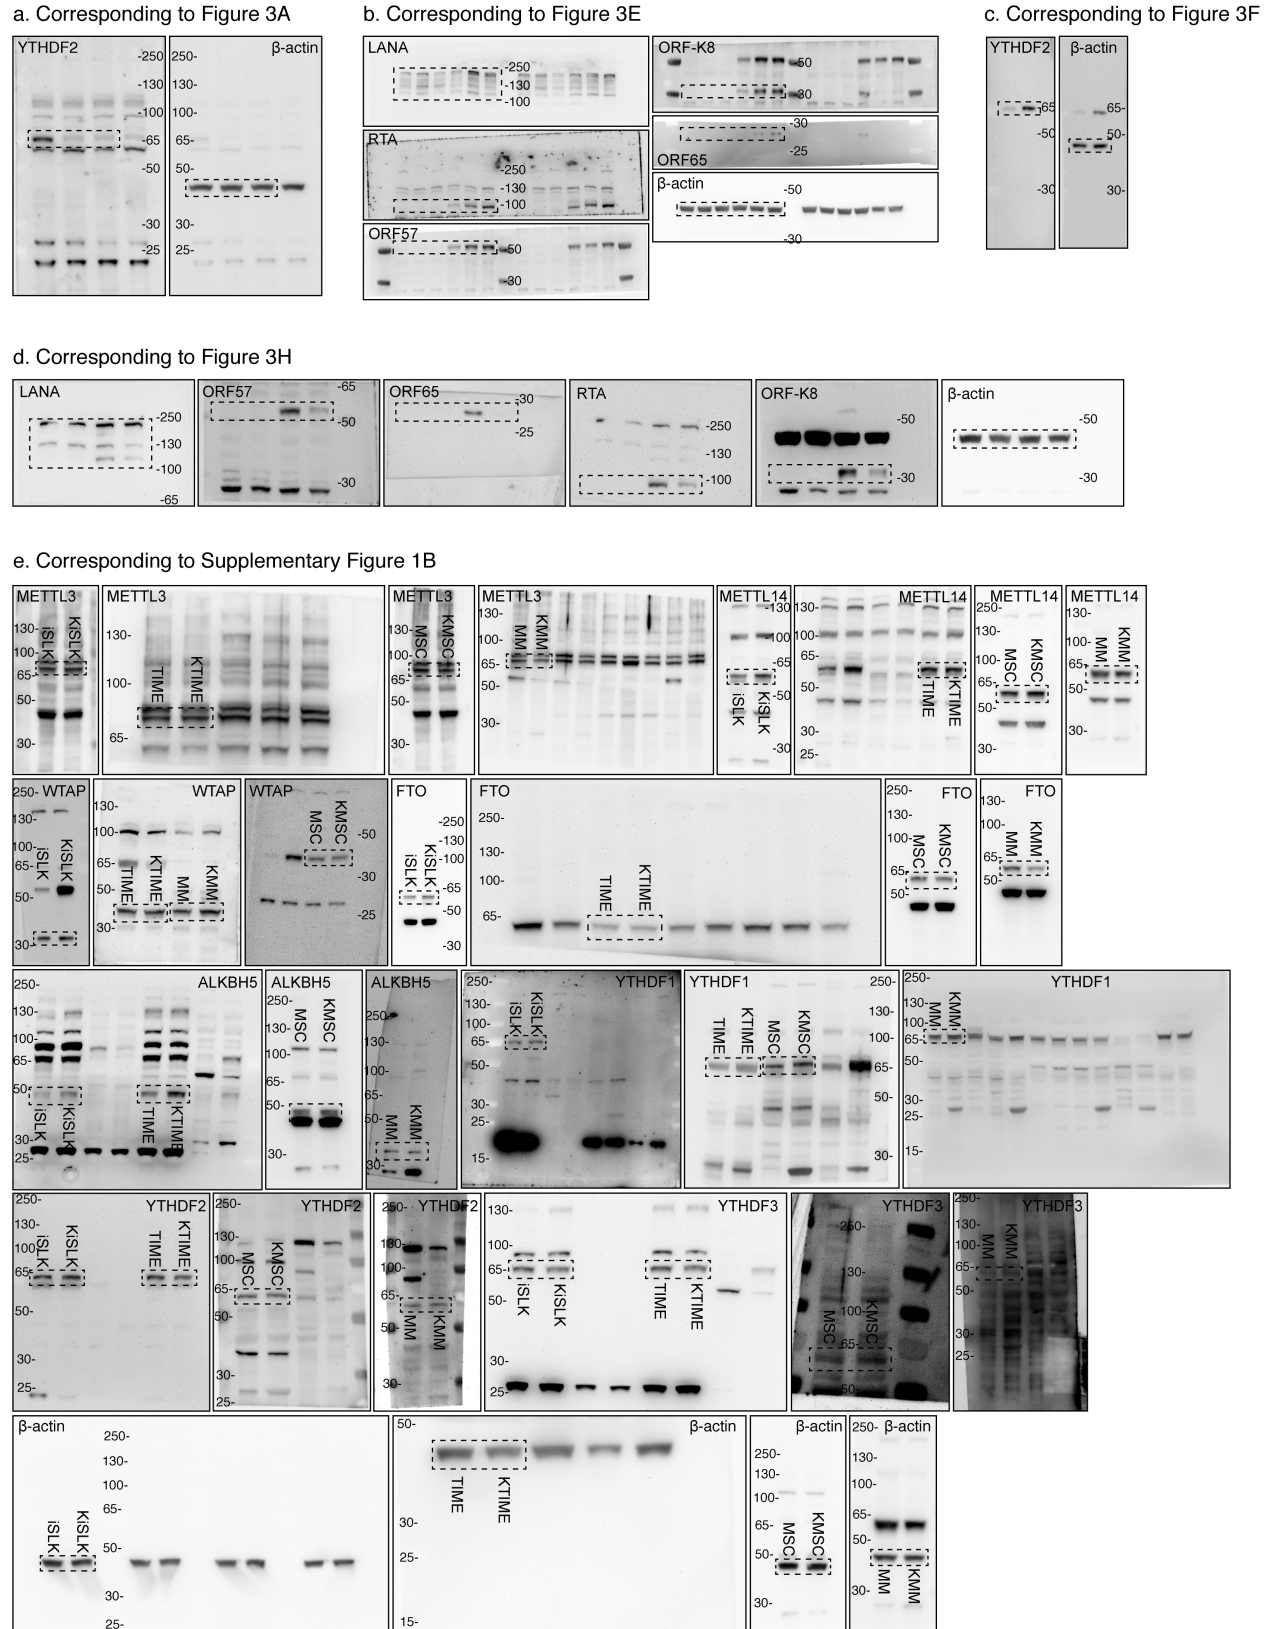

f. Corresponding to Supplementary Figure 1D (KISLK)

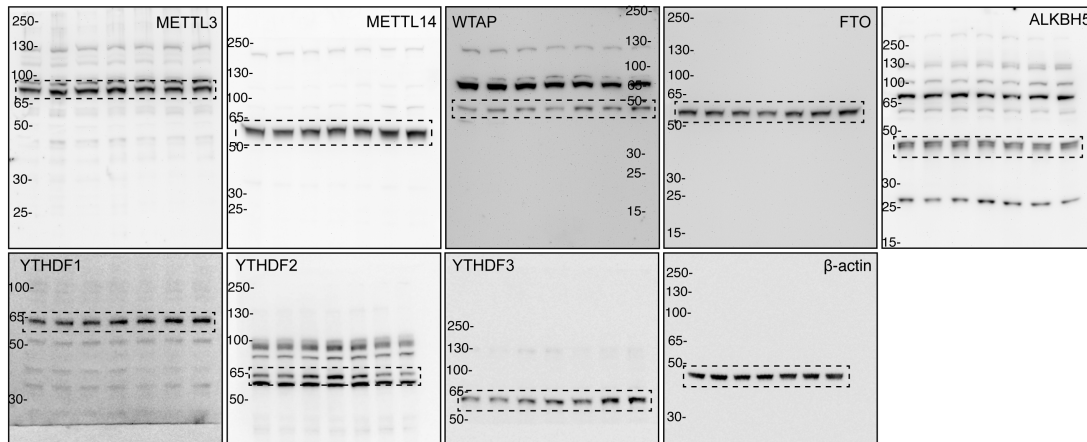

g. Corresponding to Supplementary Figure 1D (BCBL1-R)

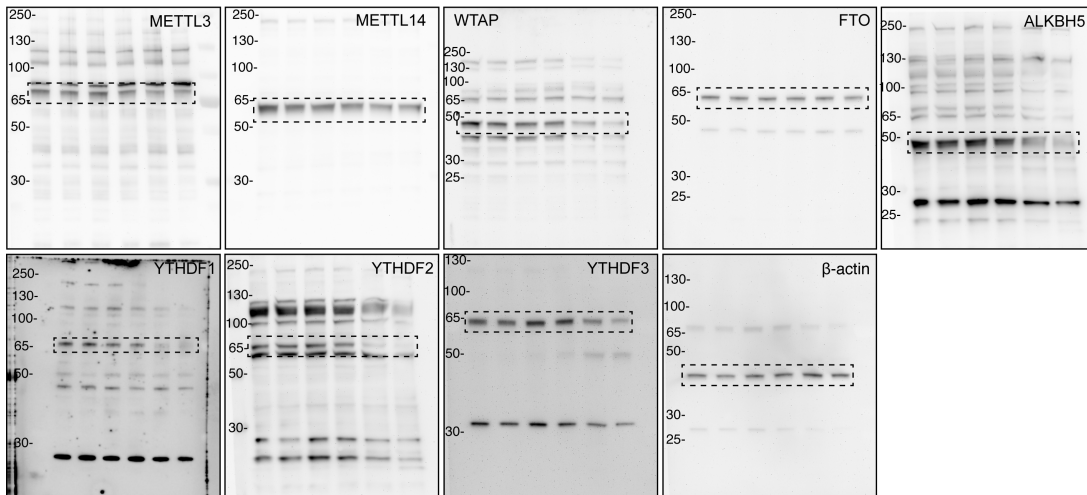

h. Corresponding to Supplementary Figure 3A

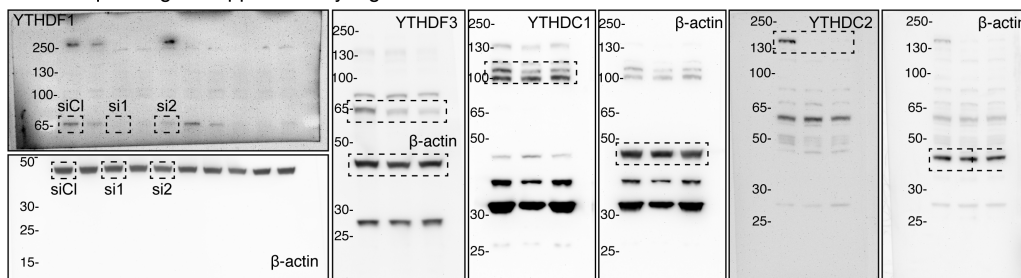

i. Corresponding to Supplementary Figure 3E

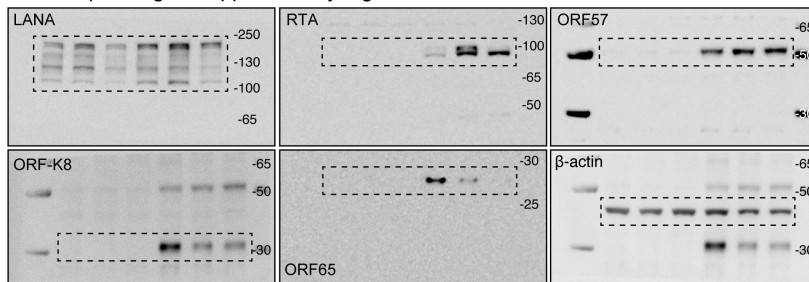

**Supplementary Tables**

**Supplementary Table 1. Latent KSHV m<sup>6</sup>A/m peaks in five types of cells latently infected by KSHV.**

See Supplementary Dataset 1.

**Supplementary Table 2. Latent and lytic KSHV m<sup>6</sup>A/m peaks in KiSLK and BCBL1-R cells.** The latent KiSLK and BCBL1-R data is the same as in Supplementary Table 1 and are included here for ease of comparison.

See Supplementary Dataset 2.

**Supplementary Table 3. Summary of cellular m<sup>6</sup>A/m peaks from three biological replicates of all cell types.**

| Sample name     | # peaks     |             |             | # overlapping peaks |                  |                  |                      |                           |
|-----------------|-------------|-------------|-------------|---------------------|------------------|------------------|----------------------|---------------------------|
|                 | Replicate 1 | Replicate 2 | Replicate 3 | Replicates 1 & 2    | Replicates 1 & 3 | Replicates 2 & 3 | Replicates 1 & 2 & 3 | Three replicates combined |
| KiSLK, 24hr     | 18027       | 17294       | 15896       | 13607               | 13115            | 14634            | 12204                | 14349                     |
| KiSLK, 48hr     | 18989       | 15096       | 16374       | 12666               | 13803            | 13566            | 11750                | 13720                     |
| KiSLK, latent   | 17762       | 17410       | 15085       | 12515               | 12194            | 13562            | 11102                | 13271                     |
| iSLK            | 20211       | 16816       | 15359       | 14908               | 14050            | 14039            | 13317                | 15367                     |
| KMSC, latent    | 23166       | 15056       | 15693       | 13297               | 13660            | 13510            | 12299                | 13835                     |
| MSC             | 23453       | 16401       | 16919       | 14694               | 15395            | 14571            | 13668                | 15051                     |
| KTIME, latent   | 19500       | 17071       | 17232       | 14808               | 15111            | 15466            | 13931                | 16326                     |
| TIME            | 20076       | 15324       | 14817       | 13947               | 13348            | 13341            | 12552                | 14569                     |
| BCBL1-R, 48hr   | 10759       | 8440        | 11573       | 5858                | 7647             | 7169             | 5630                 | 6269                      |
| BCBL1-R, latent | 22205       | 17203       | 23431       | 15942               | 18011            | 15726            | 14571                | 18649                     |
| KMM, latent     | 11835       | 12173       | 11626       | 9814                | 9300             | 10641            | 8340                 | 9589                      |
| MM              | 12823       | 9087        | 12114       | 8575                | 10565            | 8803             | 7778                 | 8663                      |

179



180 **Supplementary Table 4. Differential cellular methylation and gene expression in**  
181 **uninfected cells and cells latently infected by KSHV.**

182 See Supplementary Dataset 3.

183  
184 **Supplementary Table 5. Significantly enriched pathways of hypomethylated and**  
185 **hypermethylated cellular genes following latent KSHV infection.**

186 See Supplementary Dataset 4.

187  
188 **Supplementary Table 6. Differential cellular methylation and gene expression in**  
189 **KSHV-infected cells induced for lytic replication for 48 h compared to uninduced**  
190 **cells in KiSLK and BCBL1-R cells.**

191 See Supplementary Dataset 5.

192  
193 **Supplementary Table 7. Significantly enriched pathways of 5'UTR**  
194 **hypomethylated and 3'UTR hypermethylated cellular genes in KSHV-infected cells**  
195 **induced for lytic replication for 48 h compared to uninduced cells in KiSLK and**  
196 **BCBL1-R cells.**

197 See Supplementary Dataset 6.

198

199

200 **Supplementary Table 8: Summary of the numbers of mapped cellular and viral**  
 201 **sequencing reads in different samples.**  
 202

| Sample          | Cellular reads |          |             |          |             |          |
|-----------------|----------------|----------|-------------|----------|-------------|----------|
|                 | Replicate 1    |          | Replicate 2 |          | Replicate 3 |          |
|                 | IP             | Input    | IP          | Input    | IP          | Input    |
| iSLK            | 47259226       | 45371211 | 61471530    | 41234673 | 51757410    | 44279942 |
| KiSLK, latent   | 51077525       | 49414760 | 46870298    | 36598637 | 39848756    | 25708141 |
| KiSLK, 24h      | 46941244       | 33704057 | 47175748    | 37129864 | 38870071    | 23149150 |
| KiSLK, 48h      | 42600259       | 36427970 | 28355590    | 34569118 | 52739535    | 29175970 |
| BCBL1-R, latent | 60904961       | 51178970 | 70324105    | 34964036 | 58419322    | 65588251 |
| BCBL1-R, 48h    | 8982177        | 11135640 | 13561807    | 11486260 | 23616859    | 17104239 |
| KMSC, latent    | 66873093       | 46392153 | 39779820    | 30369603 | 47039116    | 38341770 |
| MSC             | 66423259       | 47493604 | 52700167    | 35094806 | 52699578    | 33535825 |
| KTIME, latent   | 45408410       | 43870273 | 58983797    | 25871277 | 60897505    | 28616979 |
| TIME            | 58775750       | 37985952 | 55671973    | 28000760 | 56725250    | 27487994 |
| KMM, latent     | 59707262       | 67310734 | 37019671    | 31486490 | 22074030    | 31486490 |
| MM              | 53009118       | 42845232 | 27776700    | 25062040 | 37420391    | 35441818 |

  

| Sample          | Viral reads |          |             |          |             |          |
|-----------------|-------------|----------|-------------|----------|-------------|----------|
|                 | Replicate 1 |          | Replicate 2 |          | Replicate 3 |          |
|                 | IP          | Input    | IP          | Input    | IP          | Input    |
| KiSLK, 24h      | 1909503     | 1647644  | 4408403     | 3124248  | 3237258     | 1937454  |
| KiSLK, 48h      | 2980397     | 3108333  | 3743536     | 3798058  | 8904549     | 3621940  |
| KiSLK, latent   | 92214       | 43348    | 214004      | 56788    | 139498      | 28325    |
| BCBL1-R, latent | 1127138     | 763352   | 1605556     | 442130   | 1378019     | 954780   |
| BCBL1-R, 48h    | 34086056    | 35133738 | 19314942    | 17007273 | 31057727    | 17935625 |
| KMSC, latent    | 214097      | 45195    | 124565      | 28162    | 165219      | 41329    |
| KTIME, latent   | 21470       | 15657    | 82365       | 18774    | 77561       | 20560    |
| KMM, latent     | 177673      | 62401    | 201293      | 34612    | 106457      | 27068    |

203
